# Supplementary material for: RNA Aptamer Targeting of Adam8 in Cancer Growth and Metastasis
Source: MDPI journal article supplement (doi:10.3390/cancers15123254), 2023-06-20
Supplement: s1 [file s1]

Methods of Supplementary Results:

Mouse peripheral blood mononuclear cell (PBMC) isolation and Adam8-Apt1-26nt treatment: The Ficoll–Paque density gradient centrifugation-based method used to isolate PBMC was described previously (1). Briefly, 1ml of anticoagulant-treated mouse blood was mixed with the same volume of RPMI 1640 media. This diluted blood sample was loaded onto 3 ml of Ficoll–Paque media (1.076g/ml); then, it was centrifuged at 400g X 30 min at 20°C, the upper layer was carefully discarded, and the lower layer was transferred to a new tube. The cells were washed with three volumes of RPMI 1640 media and centrifuged at 400g X 10min at 20°C. The cell pellet was resuspended with RPMI 1640 containing 10% Fetal Bovine Serum and treated with 3uM Adam8-Apt1-26nt for 24h in 5% CO<sub>2</sub> incubator at 37°C. Both adherent and suspension cells were harvested, and total RNA isolation was performed.

Mouse bone marrow cells’ isolation: mouse femur and tibia were dissected and flushed with RPMI 1640 media containing 10% fetal bovine serum. The flushed bone marrow cells were treated with 3uM Adam8-Apt1-26nt for 24h in a 5% CO<sub>2</sub> incubator at 37°C. Both adherent and suspension cells were harvested, and total RNA isolation was performed.

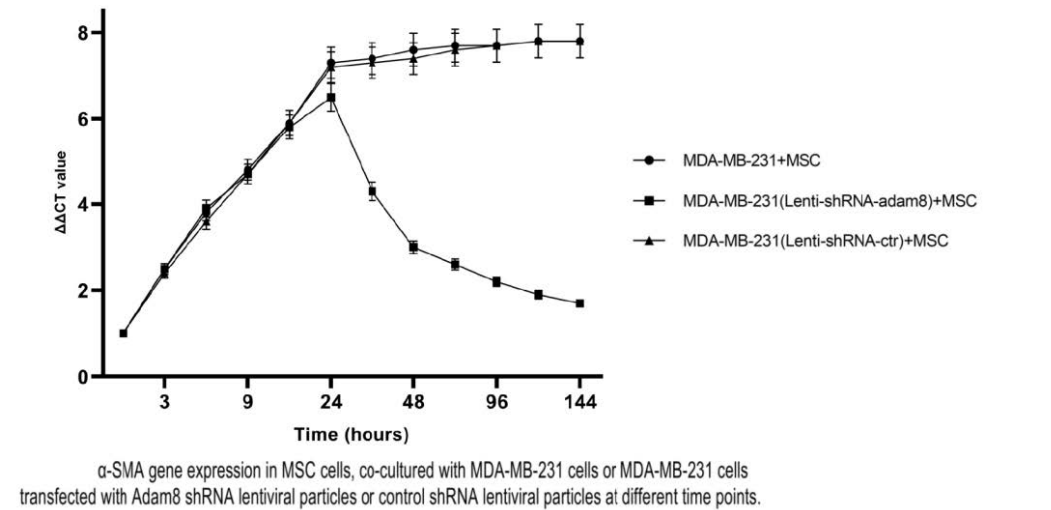

Figure S1. A-SMA gene expression in MSCs co-cultured with MDA-MB-231-Adam8-KD.

| common gene list |                |                |               |               |         |
|------------------|----------------|----------------|---------------|---------------|---------|
| ABCC2            | MYL6P1         | HIST1H2BN      | RP11-159C21.4 | RP3-445N2.1   | SYT1    |
| AC004656.1       | ADAM8          | ID1            | RP11-161H23.5 | RP3-508I15.18 | TMEM189 |
| AC005086.1       | RNU1-106P      | IL7R           | RP11-1E11.1   | RP3-510D11.1  | TPRN    |
| AC018630.1       | AL139328.1     | KIF17          | RP11-215G15.4 | RP4-553F4.6   | ZNF33B  |
| AC106753.1       | ARC            | KRTAP3-2       | RP11-249L21.4 | RP4-725G10.4  |         |
| ALG9             | ARHGAP19-SLIT1 | KRTAP3-3       | RP11-264B14.2 | RP5-902P8.10  |         |
| AC013403.13      | BNIP1          | LINC00106      | RP11-282O18.7 | SCARNA9       |         |
| CORO7-PAM16      | CA12           | LRRN4          | RP11-295P9.3  | SNORA34       |         |
| CTD-2410N18.5    | CDH6           | MARVELD3       | RP11-330A.1   | SNORA45       |         |
| AC046143.3       | CRYAA          | MTND1P15       | RP11-367G18.2 | SNORA51       |         |
| CTD-307407.11    | CTA-268H5.12   | MT-ND4         | RP11-426L16.8 | SNORA72       |         |
| CTD-3214K23.1    | CTC-425F1.2    | REV3L-IT1      | RP11-475J5.6  | SNORD100      |         |
| AC073610.5       | CTC-429P9.2    | RHBDL1         | RP11-500M8.7  | SNORD104      |         |
| AC073958.2       | CTC-457E21.7   | RN7SL114P      | RP11-697N18.1 | SNORD12       |         |
| EIF1AX-AS1       | CYP27B1        | RN7SL624P      | RP11-723D22.3 | SNORD17       |         |
| AC091948.1       | DUSP10         | RN7SL694P      | RP11-737O24.5 | SNORD38A      |         |
| AC100830.4       | ELAVL2         | RN7SL811P      | RP11-867G23.1 | SNORD4A       |         |
| AC118344.1       | FMN1           | RNA5SP383      | RP11-867G23.8 | snoU13        |         |
| AC131012.1       | FSBP           | RP11-112J3.16  | RP1-228P16.7  | SPDYA         |         |
| MIR5010          | HCG22          | RP11-152F13.10 | RP3-433F14.1  | SUB1P3        |         |

Figure S2. RNA seq data.

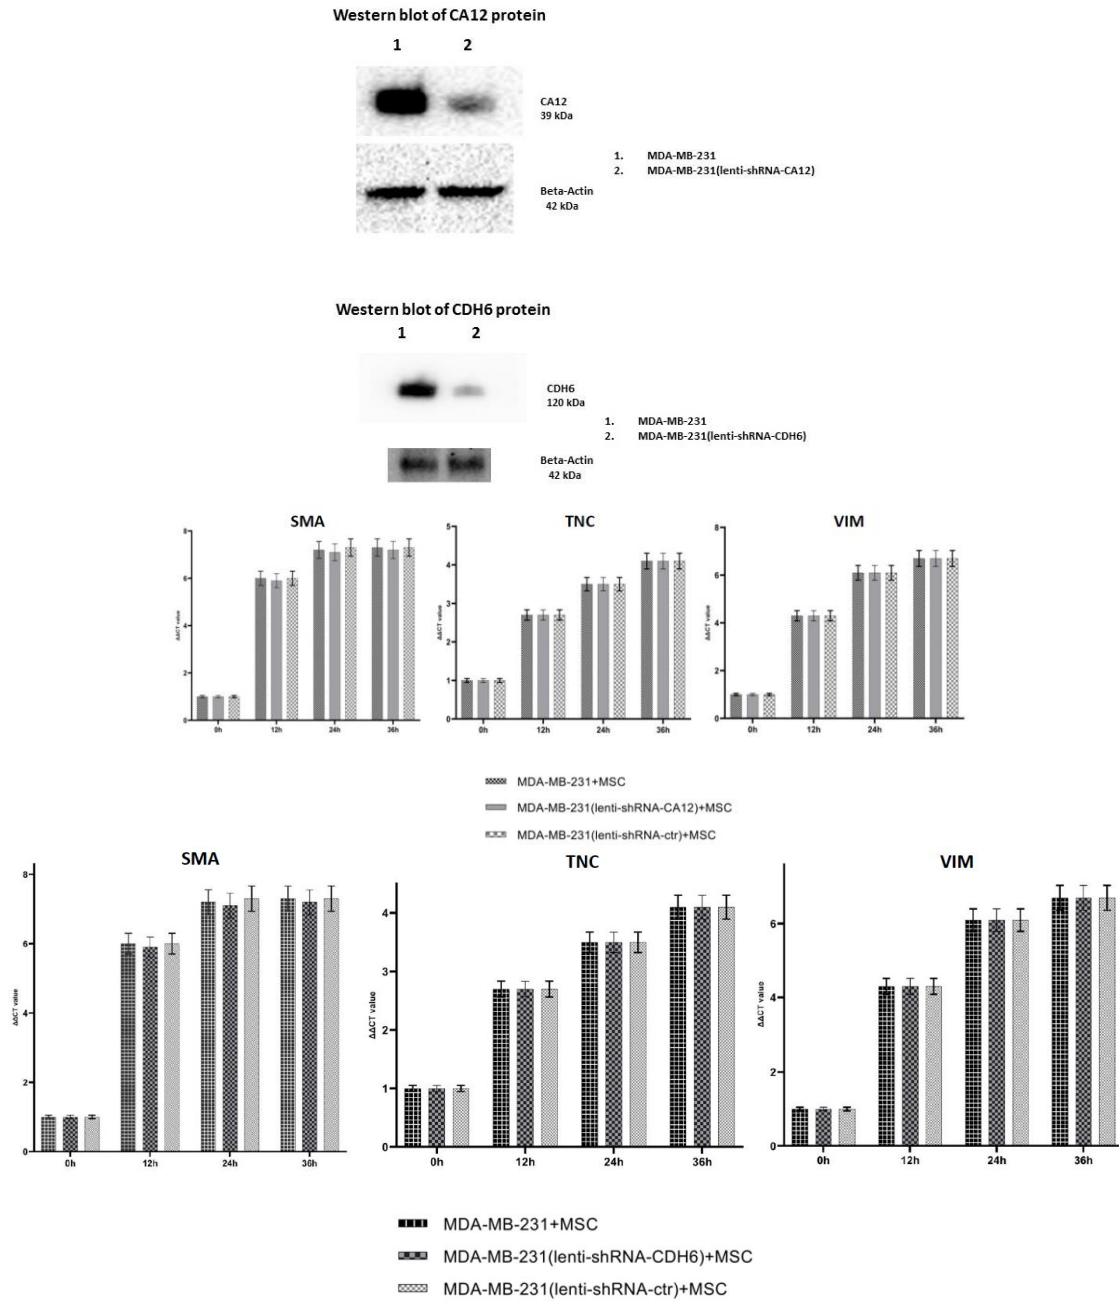

**Figure S3.** CA12 and CDH6 knockdown in MDA-MB-231 cells. SMA/TNC/VIM genes expression were quantified with RT-PCR in MDA-MB-231-CA12-KD or CDH-KD co-cultured cells.

APT-1: 5'-ucugcacguucgaauaagucuccgguguuucgagacccuu-3'  
 APT-2: 5'-caauguuugacuguacaugcggaaauuuggaccucgaag-3'  
 APT-3: 5'-cccuacggacuggacuaagcacaugacaguuaagccauaag-3'  
 APT-4: 5'-ucaguuggcacuauagccauaccuuagaaaugcaacguu-3'  
 APT-5: 5'-gguacccguugacacauuguauuuccagagauuugacac-3'

**Figure S4.** Adam8 RNA aptamer sequences.

Adam8-Apt-1-26nt RNA aptamer fail to induce pro-inflammatory cytokines expression in different types of cells

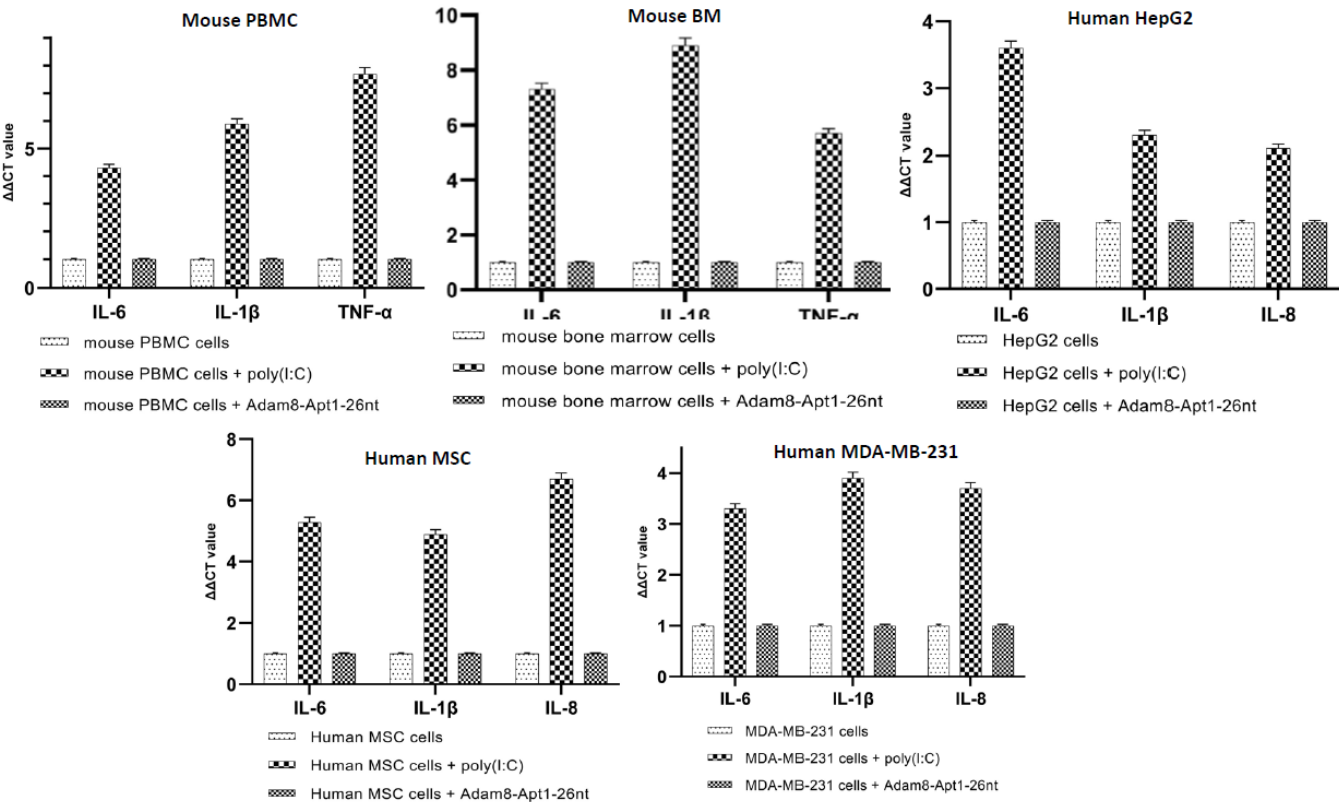

Figure S5. Adam8 Apt-1-26nt aptamer does not induce immunogenicity.

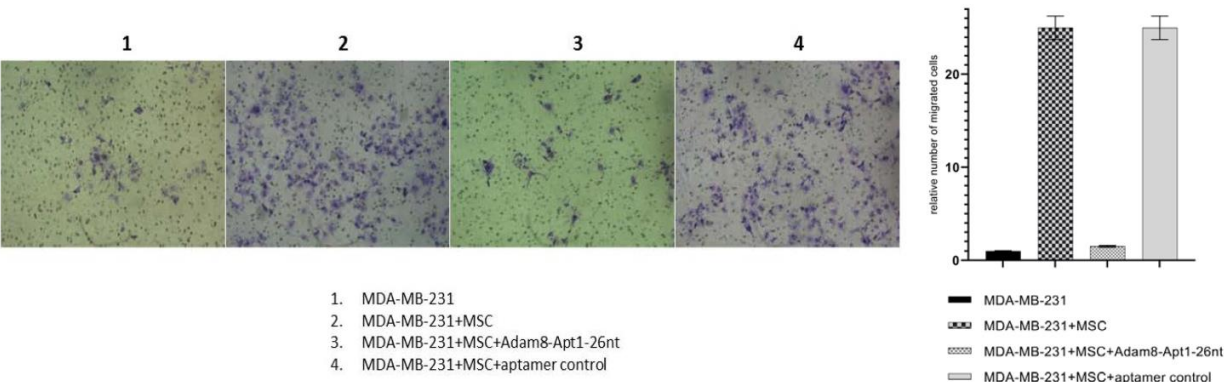

Figure S6. MDA-MB-231 cell invasion assay (16h).

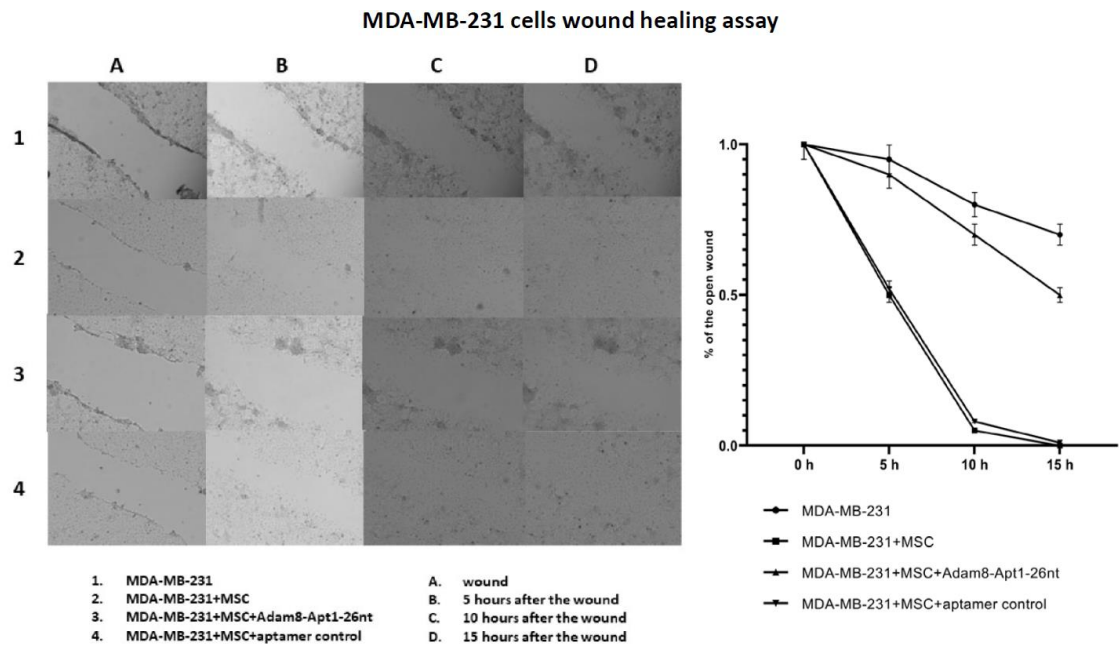

**Figure S7.** MDA-MB-231 cell wound-healing assay.

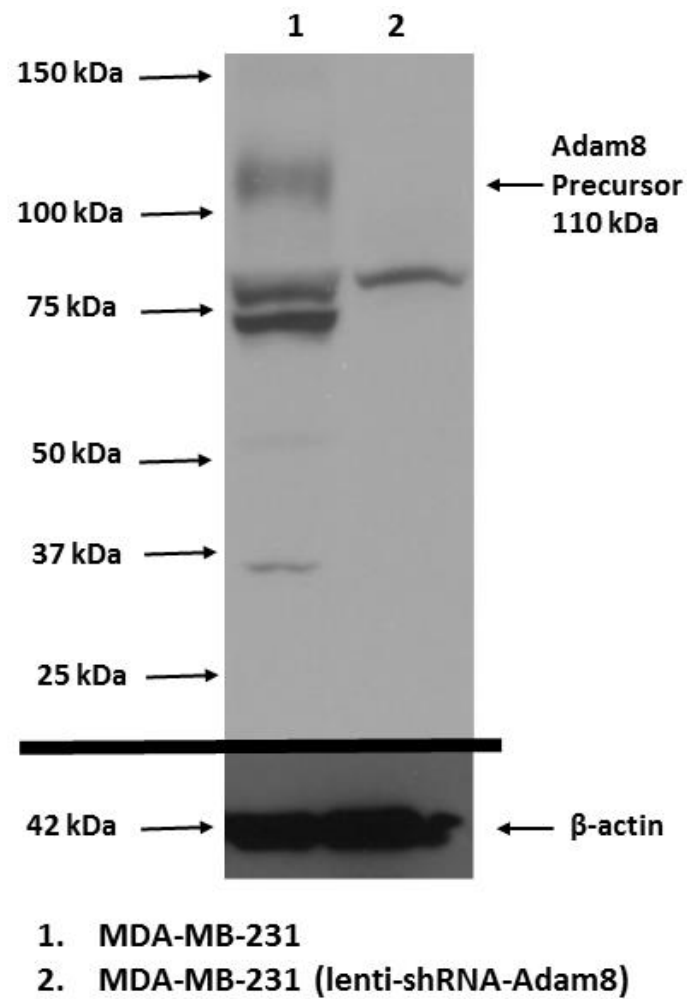

**Figure S8.** Adam8 Knockdown in MDA-MB-231 Cells.
